# Supplementary material for: Fabrication of nanosheet-assembled hollow copper–nickel phosphide spheres embedded in reduced graphene oxide texture for hybrid supercapacitors
Source: Royal Society of Chemistry journal article supplement (doi:10.1039/d2nr06305k), 2023-01-01
Supplement: d2nr06305k1.pdf [file d2nr06305k1.pdf]

## Supporting Information

### Fabrication of nanosheet-assembled hollow copper-nickel phosphide spheres embedded in reduced graphene oxide texture for hybrid supercapacitors

Maryam Amiri, Akbar Mohammadi Zardkhoshoui\* and Saied Saeed Hosseiny Davarani\*

Department of Chemistry, Shahid Beheshti University, G. C., 1983963113, Evin, Tehran, Iran.  
Corresponding authors: \*Tel: +98 21 22431661; Fax: +98 21 22431661; E-mail: [ss-hosseiny@sbu.ac.ir](mailto:ss-hosseiny@sbu.ac.ir) (S.S.H. Davarani); and [mohammadi.bahadoran@gmail.com](mailto:mohammadi.bahadoran@gmail.com) (A. Mohammadi Zardkhoshoui)

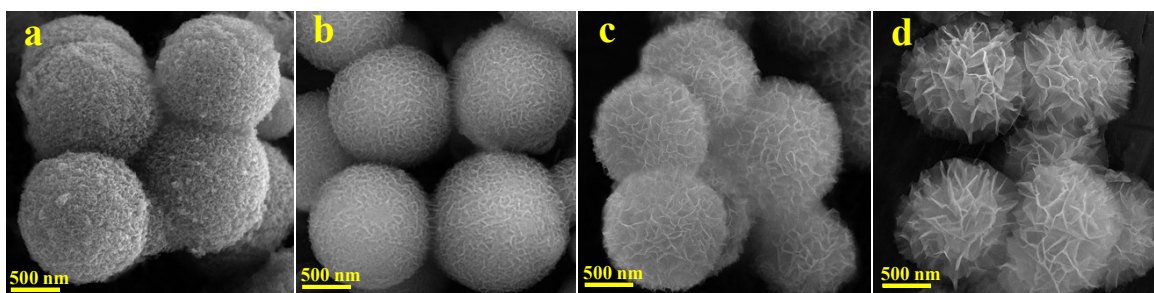

**Fig. S1** (a) FE-SEM image of the CN-EG32-100. (b) FE-SEM image of the CN-EG32-130. (c) FE-SEM image of the CN-EG32-160. (d) FE-SEM image of the CN-EG32-180.

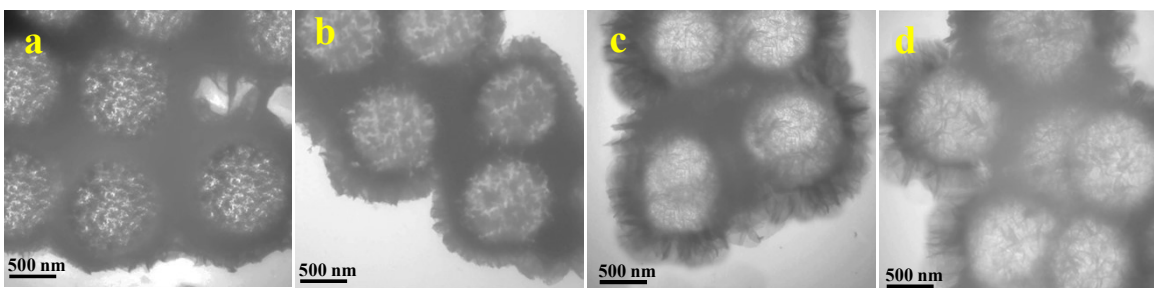

**Fig. S2** (a) TEM image of the CN-EG32-100. (b) TEM image of the CN-EG32-130. (c) TEM image of the CN-EG32-160. (d) TEM image of the CN-EG32-180.

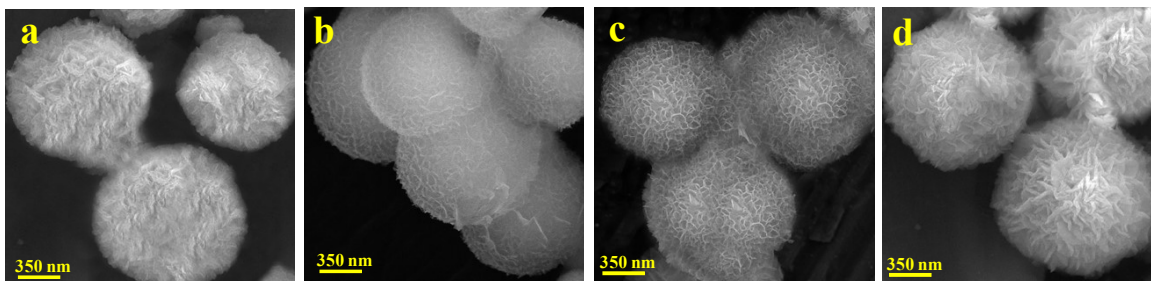

**Fig. S3** (a) FE-SEM image of the CN-EG11-180. (b) FE-SEM image of the CN-EG12-180. (c) FE-SEM image of the CN-EG21-180. (d) FE-SEM image of the CN-EG23-180.

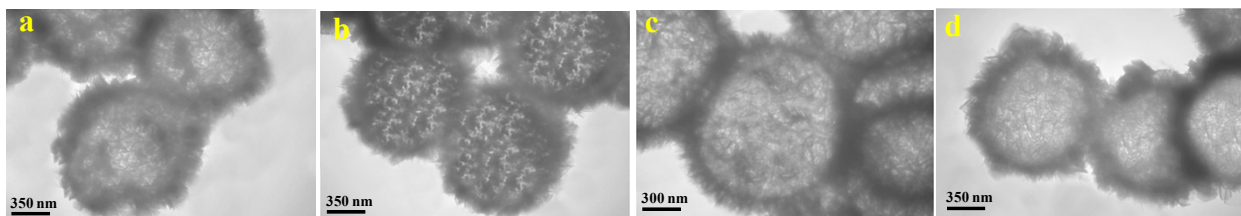

**Fig. S4** (a) TEM image of the CN-EG11-180. (b) TEM image of the CN-EG12-180. (c) TEM image of the CN-EG21-180. (d) TEM image of the CN-EG23-180.

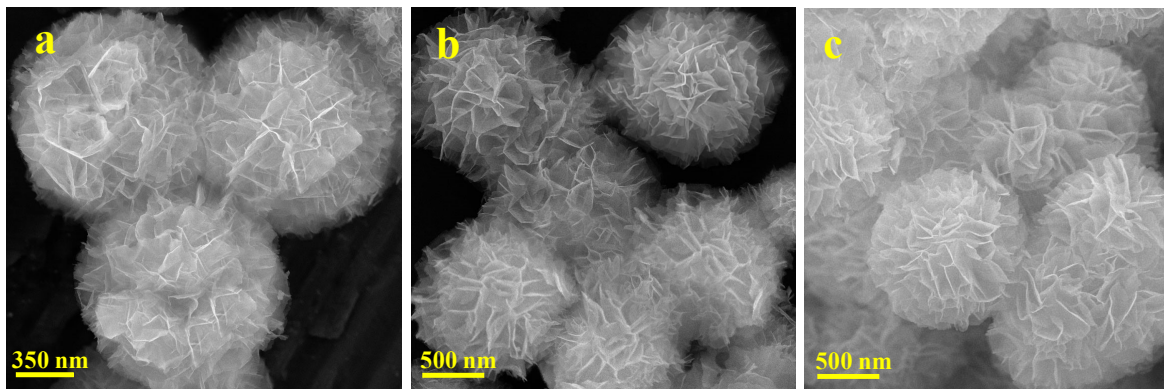

**Fig. S5** (a) FE-SEM image of the NH-CNPS-150. (b) FE-SEM image of the NH-CNPS-250. (c) FE-SEM image of the NH-CNPS-450.

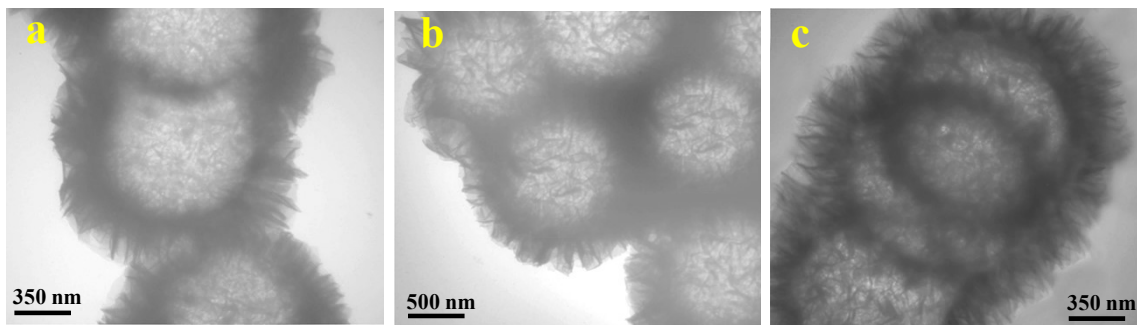

**Fig. S6** (a) TEM image of the NH-CNPS-150. (b) TEM image of the NH-CNPS-250. (c) TEM image of the NH-CNPS-450.

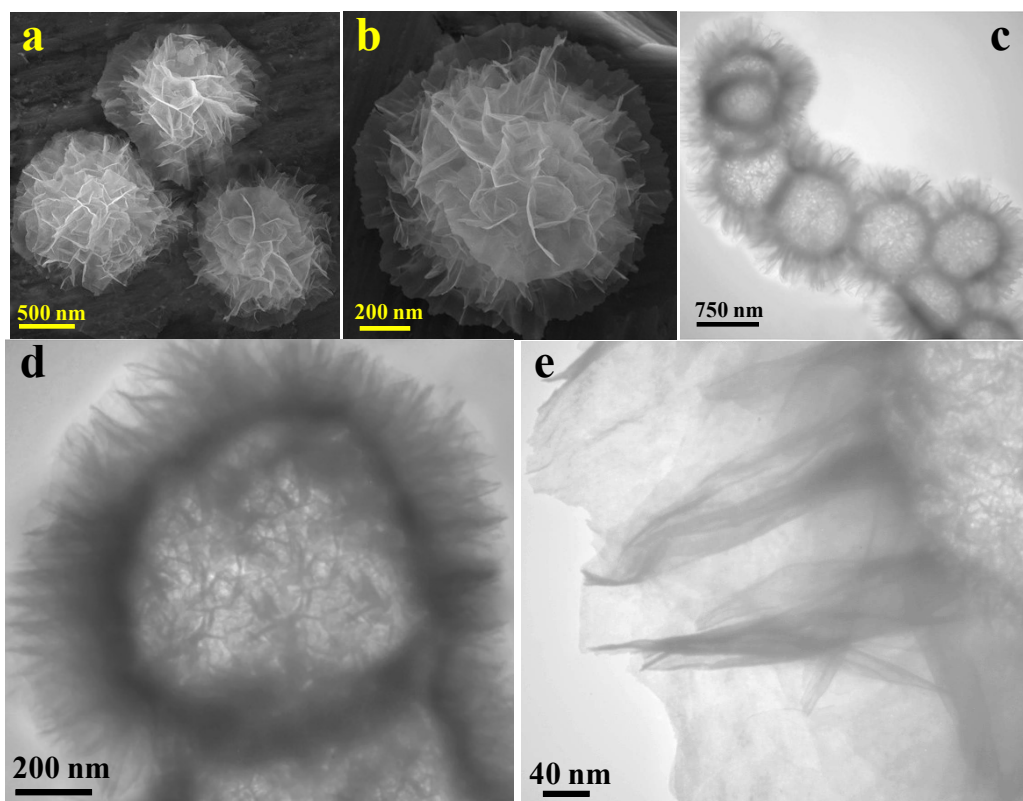

**Fig. S7** (a, b) FE-SEM images of the NH-CNPS-350. (c-e) TEM images of the NH-CNPS-350.

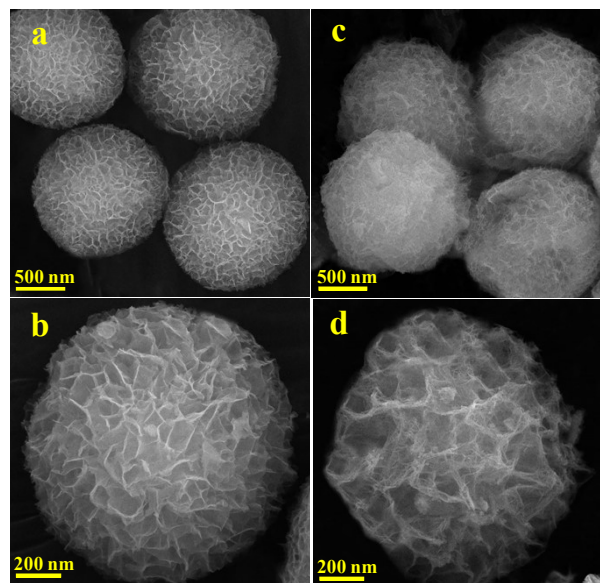

**Fig. S8** (a, b) FE-SEM images of the single Cu<sub>3</sub>P. (c, d) FE-SEM images of the single Ni<sub>2</sub>P.

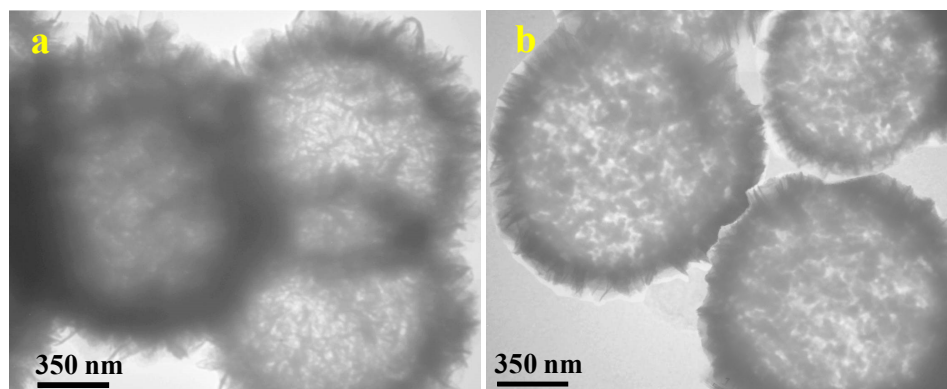

**Fig. S9** (a) TEM image of the single Cu<sub>3</sub>P. (b) FE-SEM image of the single Ni<sub>2</sub>P.

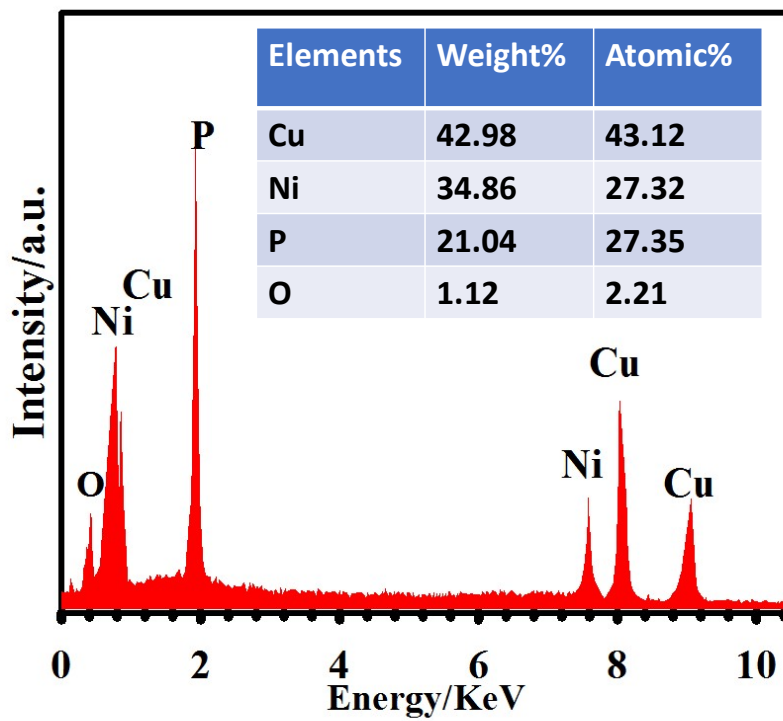

Fig. S10 EDX pattern of the NH-CNPS-350.

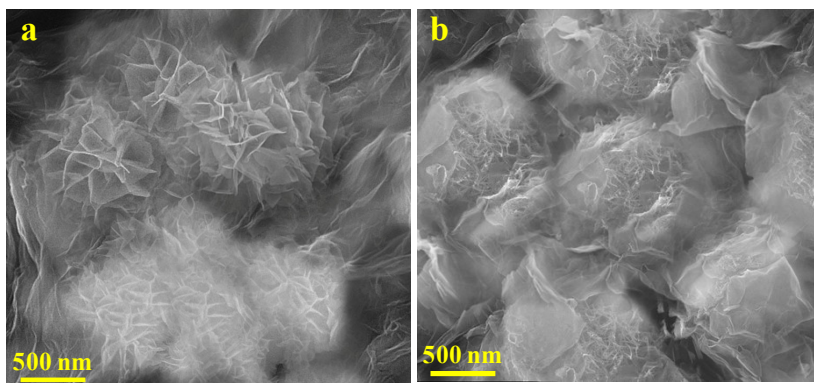

Fig. S11 (a) FE-SEM image of the NH-CNPS-rGO-1. (b) FE-SEM image of the NH-CNPS-rGO-3.



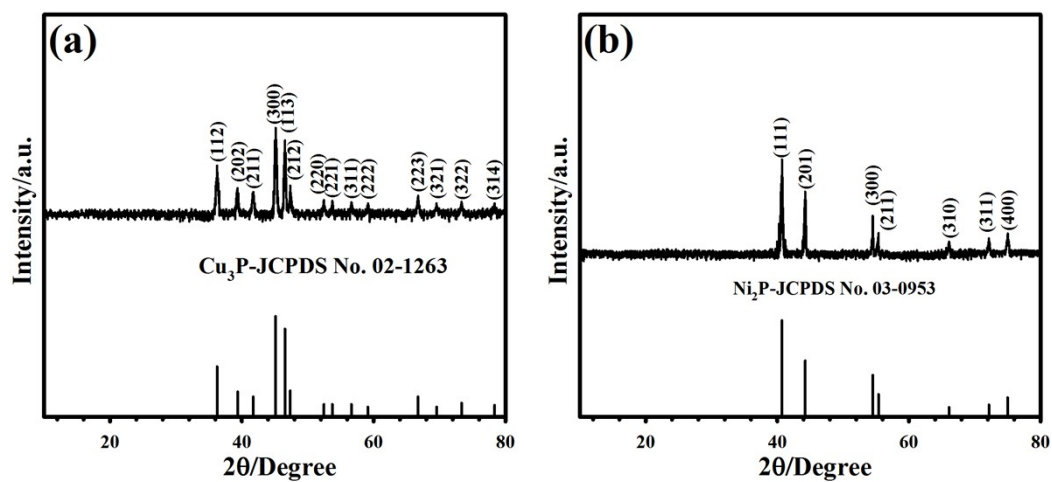

**Fig. S12** (a) XRD pattern of the  $\text{Cu}_3\text{P}$ . (b) XRD pattern of the  $\text{Ni}_2\text{P}$ .

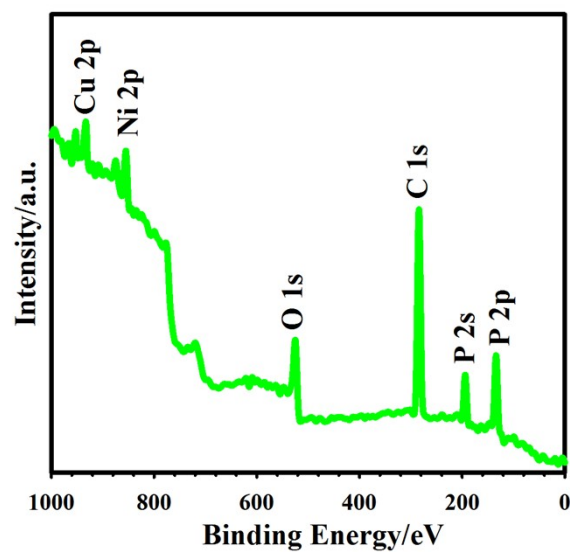

**Fig. S13** Survey profile of NH-CNPS-rGO-2.

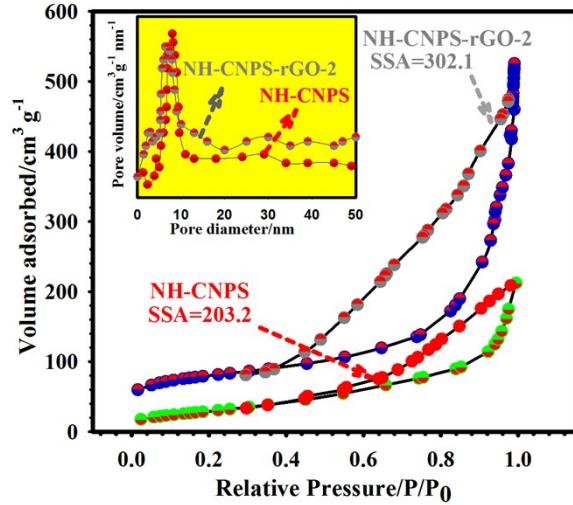

**Fig. S14** (h) BET plots of the NH-CNPS-350 and NH-CNPS-rGO-2 samples and their corresponding BJH curves (inset).

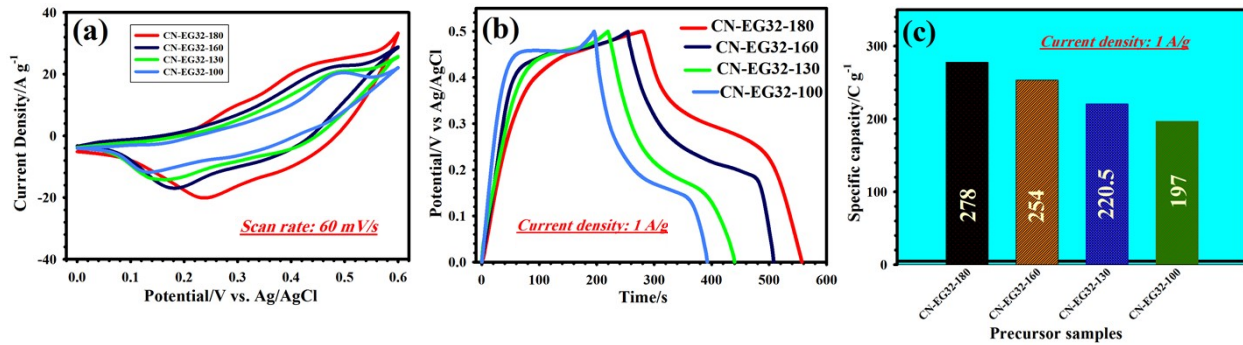

**Fig. 15** (a) CV curves of the CN-EG32-180, CN-EG32-160, CN-EG32-130, and CN-EG32-100 electrodes at 60 mV/s. (b) GCD curves of the CN-EG32-180, CN-EG32-160, CN-EG32-130, and CN-EG32-100 electrodes at 1 A/g. (c) Specific capacities of CN-EG32-180, CN-EG32-160, CN-EG32-130, and CN-EG32-100 electrodes at 1 A/g.

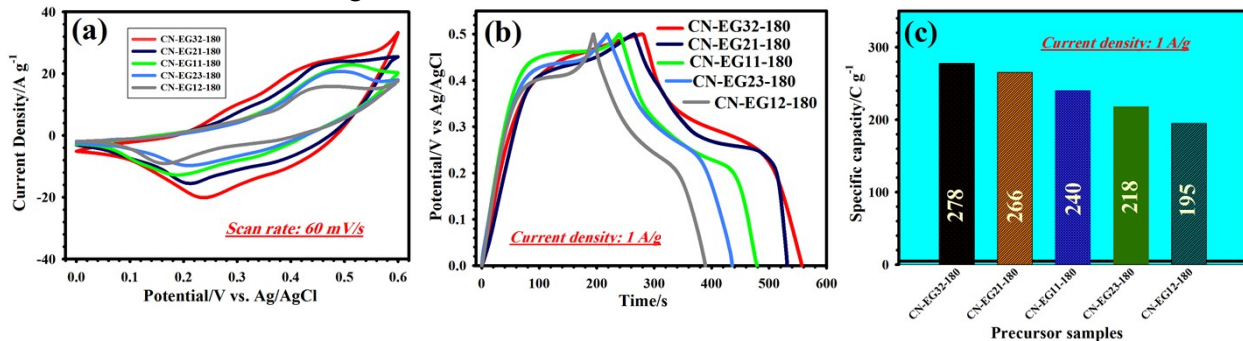

**Fig. 16** (a) CV curves of the CN-EG32-180, CN-EG21-180, CN-EG11-180, CN-EG23-180, and CN-EG12-180 electrodes at 60 mV/s. (b) GCD curves of the CN-EG32-180, CN-EG21-180, CN-EG11-180, CN-EG23-180, and CN-EG12-180 electrodes at 1 A/g. (c) Specific capacities of CN-EG32-180, CN-EG21-180, CN-EG11-180, CN-EG23-180, and CN-EG12-180 electrodes at 1 A/g.

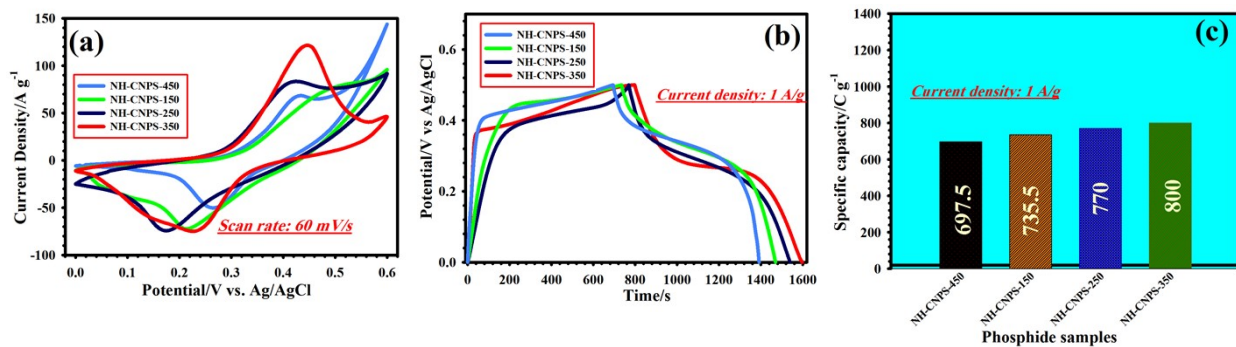

**Fig. 17** (a) CV curves of the NH-CNS-150, NH-CNS-250, NH-CNS-350, and NH-CNS-450 electrodes at 60 mV/s. (b) GCD curves of the NH-CNS-150, NH-CNS-250, NH-CNS-350, and NH-CNS-450 electrodes at 1 A/g. (c) Specific capacities of NH-CNS-150, NH-CNS-250, NH-CNS-350, and NH-CNS-450 electrodes at 1 A/g.

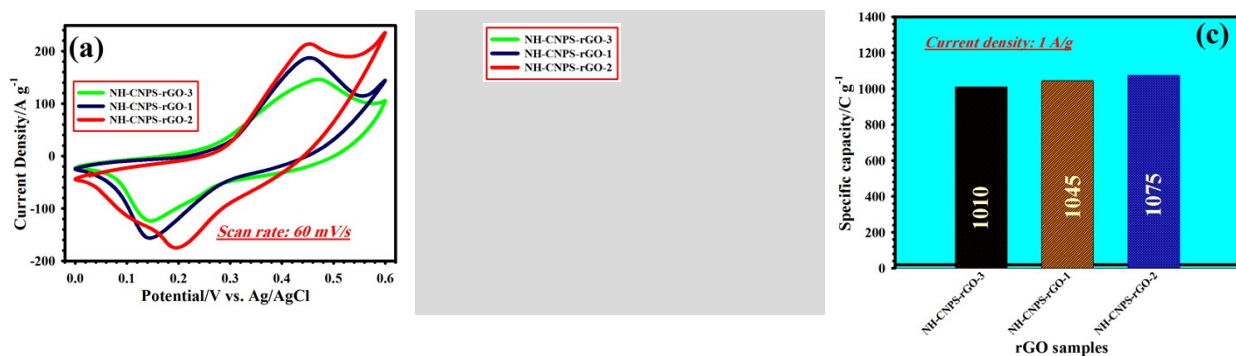

**Fig. 18** (a) CV curves of the NH-CNS-rGO-1, NH-CNS-rGO-2, and NH-CNS-rGO-3 electrodes at 60 mV/s. (b) GCD curves of the NH-CNS-rGO-1, NH-CNS-rGO-2, and NH-CNS-rGO-3 electrodes at 1 A/g. (c) Specific capacities of NH-CNS-rGO-1, NH-CNS-rGO-2, and NH-CNS-rGO-3 electrodes at 1 A/g.

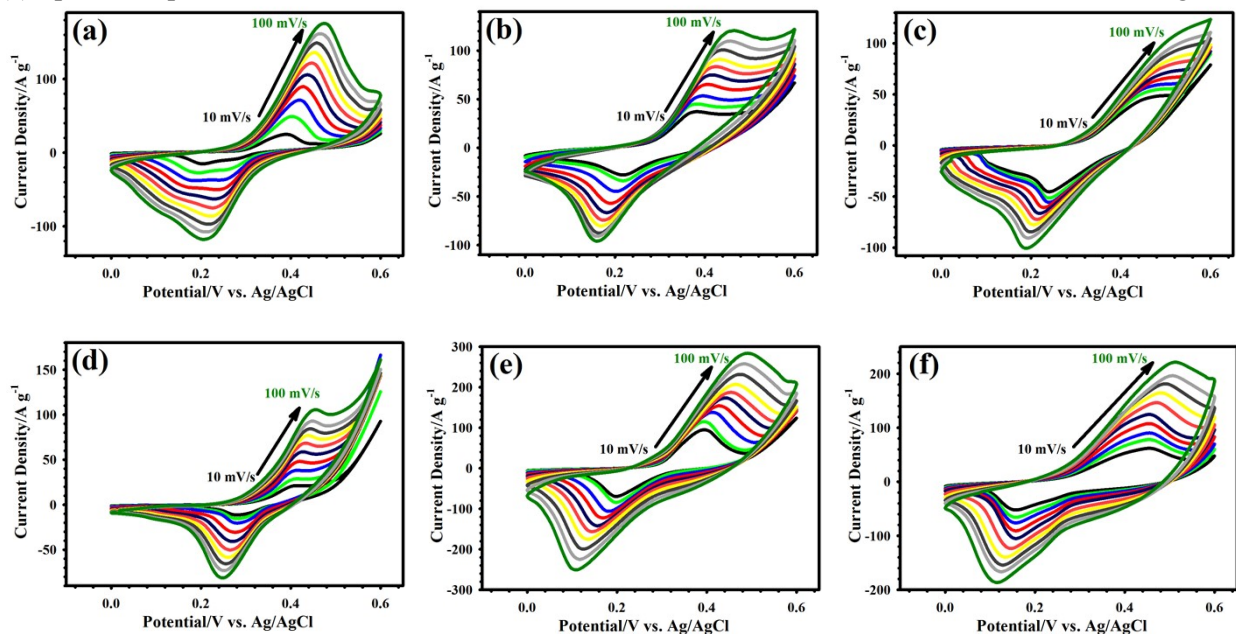



**Fig. S19** (a) CV curves of the NH-CNS-350 electrode at various scan rates from 10 to 100 mV/s. (b) CV curves of the NH-CNS-250 electrode at various scan rates from 10 to 100 mV/s. (c) CV curves of the NH-CNS-150 electrode at various scan rates from 10 to 100 mV/s. (d) CV curves of the NH-CNS-450 electrode at various scan rates from 10 to 100 mV/s. (e) CV curves of the NH-CNS-rGO-1 electrode at various scan rates from 10 to 100 mV/s. (f) CV curves of the NH-CNS-rGO-3 electrode at various scan rates from 10 to 100 mV/s.

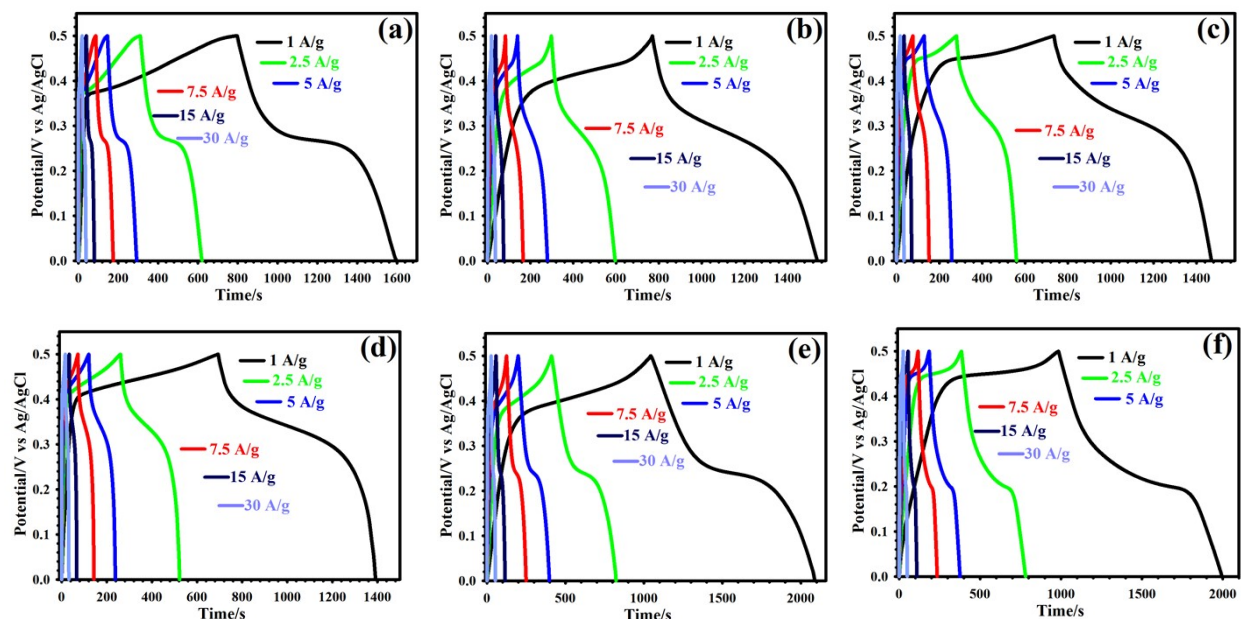

**Fig. S20** (a) GCD curves of the NH-CNS-350 electrode from 1 to 30 A/g. (b) GCD curves of the NH-CNS-250 electrode from 1 to 30 A/g. (c) GCD curves of the NH-CNS-150 electrode from 1 to 30 A/g. (d) GCD curves of the NH-CNS-450 electrode from 1 to 30 A/g. (e) GCD curves of the NH-CNS-rGO-1 electrode from 1 to 30 A/g. (f) GCD curves of the NH-CNS-rGO-3 electrode from 1 to 30 A/g.

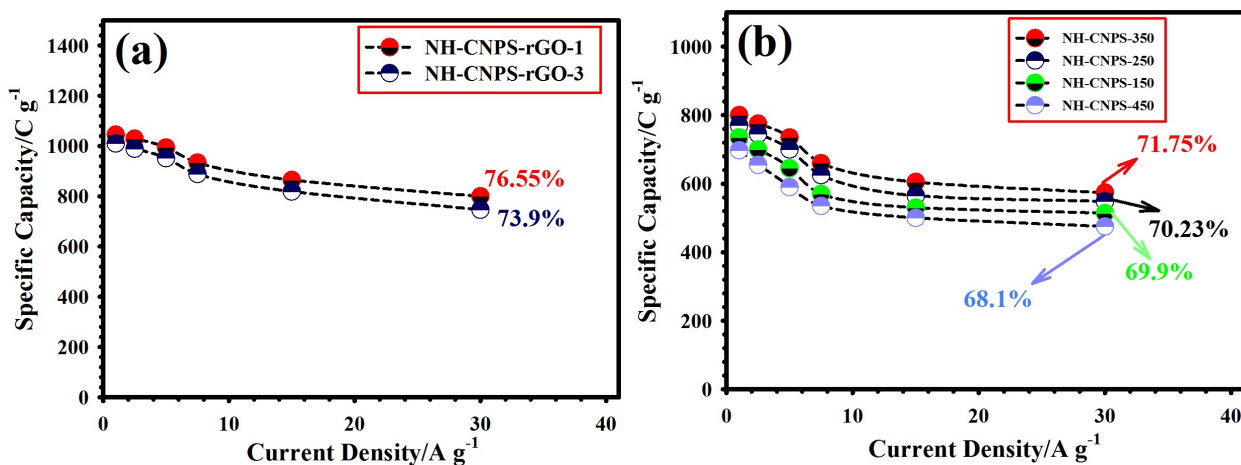

**Fig. S21** (a) Specific capacities vs. current densities of the NH-CNPS-rGO-1 and NH-CNPS-rGO-3. (b) Specific capacities vs. current densities of the NH-CNPS-150, NH-CNPS-250, NH-CNPS-350, and NH-CNPS-450.

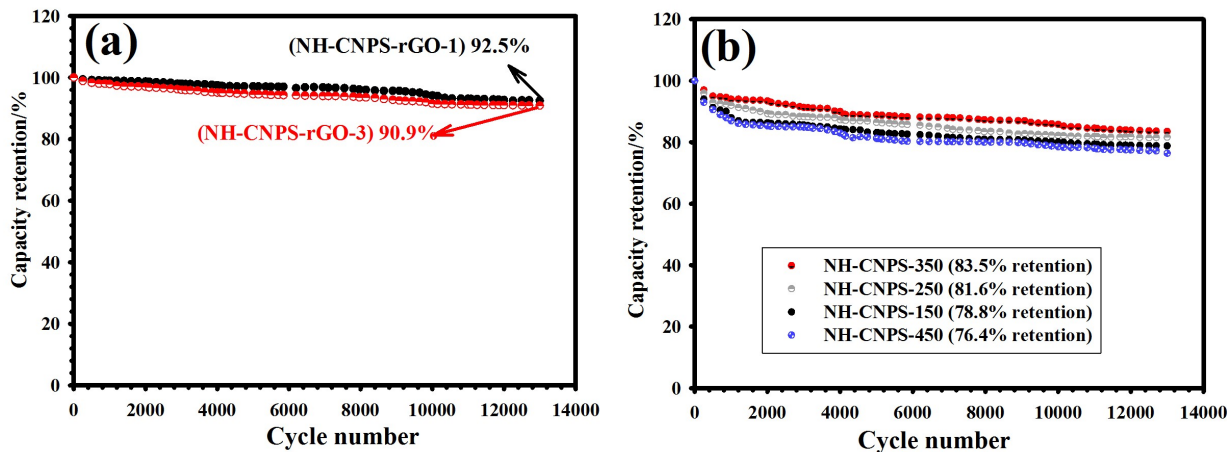

**Fig. S22** (a) Durability of the NH-CNPS-rGO-1 and NH-CNPS-rGO-3 electrodes at 15 A/g. (b) Durability of the NH-CNPS-150, NH-CNPS-250, NH-CNPS-350, and NH-CNPS-450 electrodes at 15 A/g.

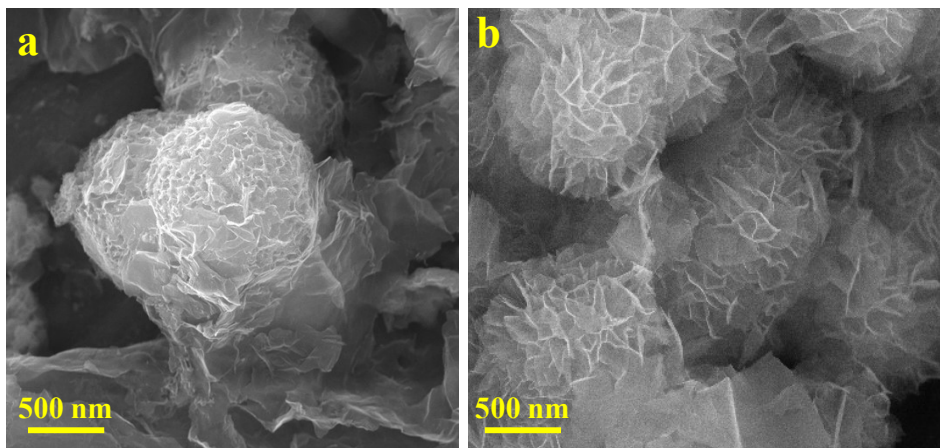

**Fig. S23** (a) FE-SEM images of the NH-CNPS-rGO-2 after 13000 GCD cycles. (b) FE-SEM images of the NH-CNPS-350 after 13000 GCD cycles.

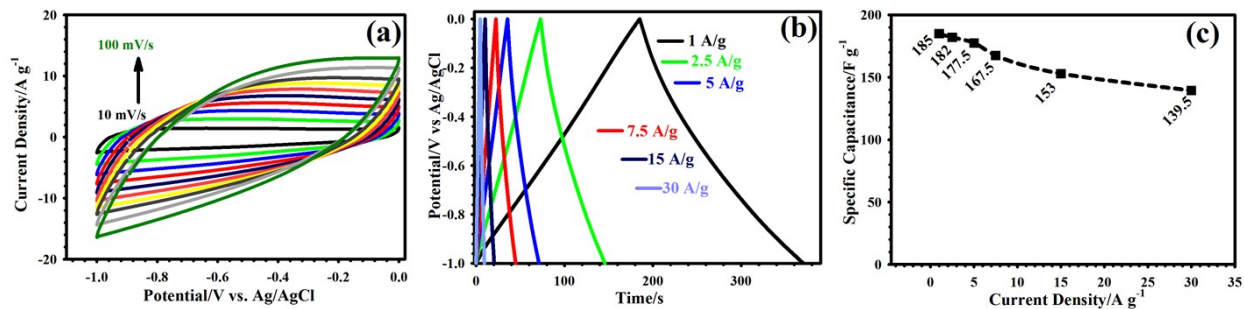

**Fig. S24** (a) CVs of the AC electrode from 10 to 100 mV/s. (b) GCD graphs of the AC from 1 to 30 A/g. (c) Specific capacities vs. current densities of the AC electrode.

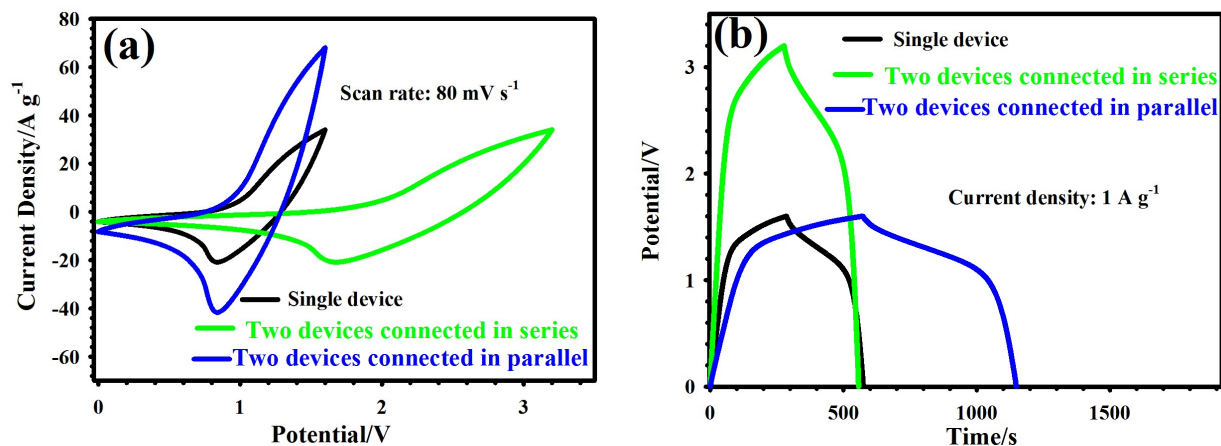

**Fig. S25** (a) CV curves of single and two devices connected in series and parallel at scan rate of 80 mV/s. (b) GCD curves of single and two devices connected in series and parallel at 1 A g<sup>-1</sup>.

**Table S1.** The as-synthesized precursors and their corresponding synthesis parameters

| Entry | Starting materials | Solvothermal Temperature (°C) | Solvothermal Time (h) | mmol ratios of the Cu(CH <sub>3</sub> COO) <sub>2</sub> :Ni(CH <sub>3</sub> COO) <sub>2</sub> | Final precursors               |
|-------|--------------------|-------------------------------|-----------------------|-----------------------------------------------------------------------------------------------|--------------------------------|
| 1     | CuNi-EG            | 100                           | 10                    | 3:2                                                                                           | CN-EG32-100                    |
| 2     | CuNi-EG            | 130                           | 10                    | 3:2                                                                                           | CN-EG32-130                    |
| 3     | CuNi-EG            | 160                           | 10                    | 3:2                                                                                           | CN-EG32-160                    |
| 4     | CuNi-EG            | 180                           | 10                    | 3:2                                                                                           | CN-EG32-180 (Optimized sample) |

**Table S2.** The as-synthesized precursors and their corresponding synthesis parameters

| Entry | Starting materials | Solvothermal Temperature (°C) | Solvothermal Time (h) | mmol ratios of the Cu(CH <sub>3</sub> COO) <sub>2</sub> :Ni(CH <sub>3</sub> COO) <sub>2</sub> | Final precursors               |
|-------|--------------------|-------------------------------|-----------------------|-----------------------------------------------------------------------------------------------|--------------------------------|
| 1     | CuNi-EG            | 180                           | 10                    | 1:1                                                                                           | CN-EG11-180                    |
| 2     | CuNi-EG            | 180                           | 10                    | 1:2                                                                                           | CN-EG12-180                    |
| 3     | CuNi-EG            | 180                           | 10                    | 2:1                                                                                           | CN-EG21-180                    |
| 4     | CuNi-EG            | 180                           | 10                    | 2:3                                                                                           | CN-EG23-180                    |
| 5     | CuNi-EG            | 180                           | 10                    | 3:2                                                                                           | CN-EG32-180 (Optimized sample) |

**Table S3.** The as-synthesized phosphide samples and their corresponding synthesis parameters

| Entry | Starting materials | Phosphorization Temperature (°C) | Phosphorization Time (h) | Final samples                  |
|-------|--------------------|----------------------------------|--------------------------|--------------------------------|
| 1     | CN-EG180           | 150                              | 2                        | NH-CNPS-150                    |
| 2     | CN-EG180           | 250                              | 2                        | NH-CNPS-250                    |
| 3     | CN-EG180           | 350                              | 2                        | NH-CNPS-350 (Optimized sample) |
| 4     | CN-EG180           | 450                              | 2                        | NH-CNPS-450                    |

**Table S4.** Comparison of the performance of the NH-CNPS-rGO-2 with other previously reported materials.

| Composition                         | Capacity (C/g)               | Cycles, retention | Rate capability               | ED (Wh kg <sup>-1</sup> ) | Reference |
|-------------------------------------|------------------------------|-------------------|-------------------------------|---------------------------|-----------|
| NiCoP                               | 761 at 1 A g <sup>-1</sup>   | 50000, 90.2%      | 91.1% at 20 A g <sup>-1</sup> | 35.6                      | 1         |
| Ni <sub>2</sub> P/NiCoP             | 741.3 at 1 A g <sup>-1</sup> | 30000, 89.2%      | 75.5% at 50 A g <sup>-1</sup> | 44.5                      | 2         |
| Ni-Co-P/POx/C                       | 583 at 1 A g <sup>-1</sup>   | 5000, 77.3%       | 62.7% at 30 A g <sup>-1</sup> | 37.59                     | 3         |
| O-Co <sub>x</sub> Ni <sub>y</sub> P | 717.1 at 1 A g <sup>-1</sup> | 5000, 95.1%       | 66.7% at 20 A g <sup>-1</sup> | 47.5                      | 4         |
| Ni <sub>2</sub> P/Ni/C              | 257.2 at 1 A g <sup>-1</sup> | 5000, 84.3%       | 60.5% at 10 A g <sup>-1</sup> | 25.4                      | 5         |
| Mn-CoP/NF                           | 456 at 0.5 A g <sup>-1</sup> | 20000, 89%        | 77.4% at 10 A g <sup>-1</sup> | 14.82                     | 6         |



|                                                          |                             |              |                               |      |            |
|----------------------------------------------------------|-----------------------------|--------------|-------------------------------|------|------------|
| Ni <sub>2</sub> P/Co <sub>3</sub> O <sub>4</sub> /N-CQDs | 1044 at 1 A g <sup>-1</sup> | 6000, 90.5%  | 83.9% at 20 A g <sup>-1</sup> | 53.5 | 7          |
| PPy@CoP                                                  | 443 at 1 A g <sup>-1</sup>  | 5000, 93%    | 50.5% at 20 A g <sup>-1</sup> | 38.1 | 8          |
| NH-CNPS-rGO-2                                            | 1075 at 1 A g <sup>-1</sup> | 13000, 94.7% | 79.3% at 30 A g <sup>-1</sup> | 64   | This study |

## References

- 1 M. Gao, W.-K. Wang, X. Zhang, J. Jiang and H.-Q. Yu, *J. Phys. Chem. C* 2018, **122**, 25174–25182.
- 2 Z. Li, K. Ma, F. Guo, C. Ji, H. Mi, P. Qiu and H. Pang, *Mater. Lett.* 2021, **288**, 129319.
- 3 X. Zhang, J. Wang, Y. Sui, F. Wei, J. Qi, Q. Meng, Y. He and D. Zhuang, *ACS Appl. Nano Mater.* 2020, **3**, 11945–11954.
- 4 S. Jiang, M. Pang, R. Liu, J. Song, R. Wang, N. Li, Q. Pan, H. Yang, W. He and J. Zhao, *J. Alloys Compd.* 2022, **895**, 162451.
- 5 Y. Xu, S. Xiong, S. Weng, J. Wang, J. Wang, H. Lin, Y. Jiao and J. Chen, *New J. Chem.*, 2020, **44**, 6810-6817.
- 6 M. Zhang, H. Du, Z. Wei, X. Zhang and R. Wang, *ACS Appl. Energy Mater.* 2022, **5**, 186–195
- 7 Z. Ji, K. Liu, L. Chen, Y. Nie, D. Pasang, Q. Yu, X. Shen, K. Xu and S. Premlatha, *J. Colloid Interface Sci.* 2022, **609**, 503-512.
- 8 C. Yue, B. Hu, W. Huang, A. Liu, Z. Guo, J. Mu, X. Zhang, X. Liu and H. Che, *J. Electroanal. Chem.* 2021, **899**, 115656.
